# Supplementary material for: Snow Leopard Dietary Preferences and Livestock Predation Revealed by Fecal DNA Metabarcoding: No Evidence for Apparent Competition Between Wild and Domestic Prey
Source: Frontiers journal article supplement (doi:10.3389/fevo.2021.783546), 2021-11-30
Supplement: Data_Sheet_1.xlsx [file Data_Sheet_1.xlsx]

## Sheet: Dietary compositions
Occurrence
Prey taxon	Scientific name	Common name	Order	Prey category	Suojia	Zhaqing	Angsai	Baizha	Xialaxiu	Zhongda	Haxiu	ALL
					n = 165	n = 70	n = 64	n = 20	n = 13	n = 10	n = 9	n = 351
1	Pseudois nayaur	Blue sheep	Artiodactyla	Wild ungulates	154	53	52	16	9	9	6	299
2	Przewalskium albirostris	White-lipped deer	Artiodactyla	Wild ungulates	0	0	3	0	0	0	1	4
3	Sus scrofa	Wild boar	Artiodactyla	Wild ungulates	0	2	1	0	0	0	1	4
4	Cervus elaphus	Red deer	Artiodactyla	Wild ungulates	0	0	0	0	1	0	0	1
5	Procapra picticaudata	Tibetan gazelle	Artiodactyla	Wild ungulates	0	2	0	0	0	0	0	2
6	Capricornis milneedwardsii	Chinese serow	Artiodactyla	Wild ungulates	0	1	0	0	0	0	0	1
7	Capra hircus	Domestic goat	Artiodactyla	Livestock	1	0	0	0	3	0	0	4
8	Bos grunniens	Domestic yak	Artiodactyla	Livestock	6	10	4	1	0	0	0	21
9	Equus caballus	Domestic horse	Perissodactyla	Livestock	0	0	0	1	0	0	0	1
10	Ovis aries	Domestic sheep	Artiodactyla	Livestock	0	3	0	0	0	0	0	3
11	Marmota himalayana	Himalayan marmot	Rodentia	Small mammals	4	8	4	3	0	1	2	22
12	Ochotona koslowi	Kozlov's pika	Lagomorpha	Small mammals	0	1	4	0	0	0	0	5
13	Ochotona curzoniae	Plateau pika	Lagomorpha	Small mammals	5	2	4	1	0	0	0	12
14	Apodemus draco	South China field mouse	Rodentia	Small mammals	0	0	2	1	0	0	0	3
15	Neodon irene	Chinese scrub vole	Rodentia	Small mammals	2	0	0	0	0	0	0	2
16	Niviventer confucianus	Confucian niviventer	Rodentia	Small mammals	0	0	2	0	0	0	0	2
17	Apodemus latronum	Large-eared field mouse	Rodentia	Small mammals	0	1	2	0	0	0	0	3
18	Lepus oiostolus	Woolly hare	Lagomorpha	Small mammals	0	1	1	0	0	0	0	2
19	Buteo sp.	Buteonine hawk	Accipitriformes	Birds	1	0	0	0	0	0	0	1
20	Ithaginis cruentus	Blood pheasant	Galliformes	Birds	0	0	1	0	0	0	0	1
					173	84	80	23	13	10	10	393
FOO
Prey taxon	Scientific name	Common name	Order	Prey category	Suojia	Zhaqing	Angsai	Baizha	Xialaxiu	Zhongda	Haxiu	ALL
					n = 165	n = 70	n = 64	n = 20	n = 13	n = 10	n = 9	n = 351
1	Pseudois nayaur	Blue sheep	Artiodactyla	Wild ungulates	0.9333	0.7571	0.8125	0.8	0.6923	0.9	0.6667	0.8519
2	Przewalskium albirostris	White-lipped deer	Artiodactyla	Wild ungulates	0	0	0.0469	0	0	0	0.1111	0.0114
3	Sus scrofa	Wild boar	Artiodactyla	Wild ungulates	0	0.0286	0.0156	0	0	0	0.1111	0.0114
4	Cervus elaphus	Red deer	Artiodactyla	Wild ungulates	0	0	0	0	0.0769	0	0	0.0028
5	Procapra picticaudata	Tibetan gazelle	Artiodactyla	Wild ungulates	0	0.0286	0	0	0	0	0	0.0057
6	Capricornis milneedwardsii	Chinese serow	Artiodactyla	Wild ungulates	0	0.0143	0	0	0	0	0	0.0028
7	Capra hircus	Domestic goat	Artiodactyla	Livestock	0.0061	0	0	0	0.2308	0	0	0.0114
8	Bos grunniens	Domestic yak	Artiodactyla	Livestock	0.0364	0.1429	0.0625	0.05	0	0	0	0.0598
9	Equus caballus	Domestic horse	Perissodactyla	Livestock	0	0	0	0.05	0	0	0	0.0028
10	Ovis aries	Domestic sheep	Artiodactyla	Livestock	0	0.0429	0	0	0	0	0	0.0085
11	Marmota himalayana	Himalayan marmot	Rodentia	Small mammals	0.0242	0.1143	0.0625	0.15	0	0.1	0.2222	0.0627
12	Ochotona koslowi	Kozlov's pika	Lagomorpha	Small mammals	0	0.0143	0.0625	0	0	0	0	0.0142
13	Ochotona curzoniae	Plateau pika	Lagomorpha	Small mammals	0.0303	0.0286	0.0625	0.05	0	0	0	0.0342
14	Apodemus draco	South China field mouse	Rodentia	Small mammals	0	0	0.0313	0.05	0	0	0	0.0085
15	Neodon irene	Chinese scrub vole	Rodentia	Small mammals	0.0121	0	0	0	0	0	0	0.0057
16	Niviventer confucianus	Confucian niviventer	Rodentia	Small mammals	0	0	0.0313	0	0	0	0	0.0057
17	Apodemus latronum	Large-eared field mouse	Rodentia	Small mammals	0	0.0143	0.0313	0	0	0	0	0.0085
18	Lepus oiostolus	Woolly hare	Lagomorpha	Small mammals	0	0.0143	0.0156	0	0	0	0	0.0057
19	Buteo sp.	Buteonine hawk	Accipitriformes	Birds	0.0061	0	0	0	0	0	0	0.0028
20	Ithaginis cruentus	Blood pheasant	Galliformes	Birds	0	0	0.0156	0	0	0	0	0.0028
					1.0485	1.2	1.25	1.15	1	1	1.1111	1.1197
POO
Prey taxon	Scientific name	Common name	Order	Prey category	Suojia	Zhaqing	Angsai	Baizha	Xialaxiu	Zhongda	Haxiu	ALL
					n = 165	n = 70	n = 64	n = 20	n = 13	n = 10	n = 9	n = 351
1	Pseudois nayaur	Blue sheep	Artiodactyla	Wild ungulates	0.8902	0.631	0.65	0.6957	0.6923	0.9	0.6	0.7608
2	Przewalskium albirostris	White-lipped deer	Artiodactyla	Wild ungulates	0	0	0.0375	0	0	0	0.1	0.0102
3	Sus scrofa	Wild boar	Artiodactyla	Wild ungulates	0	0.0238	0.0125	0	0	0	0.1	0.0102
4	Cervus elaphus	Red deer	Artiodactyla	Wild ungulates	0	0	0	0	0.0769	0	0	0.0025
5	Procapra picticaudata	Tibetan gazelle	Artiodactyla	Wild ungulates	0	0.0238	0	0	0	0	0	0.0051
6	Capricornis milneedwardsii	Chinese serow	Artiodactyla	Wild ungulates	0	0.0119	0	0	0	0	0	0.0025
7	Capra hircus	Domestic goat	Artiodactyla	Livestock	0.0058	0	0	0	0.2308	0	0	0.0102
8	Bos grunniens	Domestic yak	Artiodactyla	Livestock	0.0347	0.119	0.05	0.0435	0	0	0	0.0534
9	Equus caballus	Domestic horse	Perissodactyla	Livestock	0	0	0	0.0435	0	0	0	0.0025
10	Ovis aries	Domestic sheep	Artiodactyla	Livestock	0	0.0357	0	0	0	0	0	0.0076
11	Marmota himalayana	Himalayan marmot	Rodentia	Small mammals	0.0231	0.0952	0.05	0.1304	0	0.1	0.2	0.056
12	Ochotona koslowi	Kozlov's pika	Lagomorpha	Small mammals	0	0.0119	0.05	0	0	0	0	0.0127
13	Ochotona curzoniae	Plateau pika	Lagomorpha	Small mammals	0.0289	0.0238	0.05	0.0435	0	0	0	0.0305
14	Apodemus draco	South China field mouse	Rodentia	Small mammals	0	0	0.025	0.0435	0	0	0	0.0076
15	Neodon irene	Chinese scrub vole	Rodentia	Small mammals	0.0116	0	0	0	0	0	0	0.0051
16	Niviventer confucianus	Confucian niviventer	Rodentia	Small mammals	0	0	0.025	0	0	0	0	0.0051
17	Apodemus latronum	Large-eared field mouse	Rodentia	Small mammals	0	0.0119	0.025	0	0	0	0	0.0076
18	Lepus oiostolus	Woolly hare	Lagomorpha	Small mammals	0	0.0119	0.0125	0	0	0	0	0.0051
19	Buteo sp.	Buteonine hawk	Accipitriformes	Birds	0.0058	0	0	0	0	0	0	0.0025
20	Ithaginis cruentus	Blood pheasant	Galliformes	Birds	0	0	0.0125	0	0	0	0	0.0025
					1	1	1	1	1	1	1	1
wPOO
Prey taxon	Scientific name	Common name	Order	Prey category	Suojia	Zhaqing	Angsai	Baizha	Xialaxiu	Zhongda	Haxiu	ALL
					n = 165	n = 70	n = 64	n = 20	n = 13	n = 10	n = 9	n = 351
1	Pseudois nayaur	Blue sheep	Artiodactyla	Wild ungulates	0.9121	0.6786	0.7188	0.725	0.6923	0.9	0.6111	0.8034
2	Przewalskium albirostris	White-lipped deer	Artiodactyla	Wild ungulates	0	0	0.0365	0	0	0	0.1111	0.0095
3	Sus scrofa	Wild boar	Artiodactyla	Wild ungulates	0	0.0119	0.0078	0	0	0	0.1111	0.0066
4	Cervus elaphus	Red deer	Artiodactyla	Wild ungulates	0	0	0	0	0.0769	0	0	0.0028
5	Procapra picticaudata	Tibetan gazelle	Artiodactyla	Wild ungulates	0	0.0214	0	0	0	0	0	0.0043
6	Capricornis milneedwardsii	Chinese serow	Artiodactyla	Wild ungulates	0	0.0071	0	0	0	0	0	0.0014
7	Capra hircus	Domestic goat	Artiodactyla	Livestock	0.0061	0	0	0	0.2308	0	0	0.0114
8	Bos grunniens	Domestic yak	Artiodactyla	Livestock	0.0242	0.1048	0.0417	0.05	0	0	0	0.0427
9	Equus caballus	Domestic horse	Perissodactyla	Livestock	0	0	0	0.05	0	0	0	0.0028
10	Ovis aries	Domestic sheep	Artiodactyla	Livestock	0	0.0429	0	0	0	0	0	0.0085
11	Marmota himalayana	Himalayan marmot	Rodentia	Small mammals	0.0212	0.1	0.0469	0.125	0	0.1	0.1667	0.0527
12	Ochotona koslowi	Kozlov's pika	Lagomorpha	Small mammals	0	0.0048	0.0625	0	0	0	0	0.0123
13	Ochotona curzoniae	Plateau pika	Lagomorpha	Small mammals	0.0212	0.019	0.026	0.025	0	0	0	0.0199
14	Apodemus draco	South China field mouse	Rodentia	Small mammals	0	0	0.0234	0.025	0	0	0	0.0057
15	Neodon irene	Chinese scrub vole	Rodentia	Small mammals	0.0091	0	0	0	0	0	0	0.0043
16	Niviventer confucianus	Confucian niviventer	Rodentia	Small mammals	0	0	0.013	0	0	0	0	0.0024
17	Apodemus latronum	Large-eared field mouse	Rodentia	Small mammals	0	0.0048	0.0104	0	0	0	0	0.0028
18	Lepus oiostolus	Woolly hare	Lagomorpha	Small mammals	0	0.0048	0.0078	0	0	0	0	0.0024
19	Buteo sp.	Buteonine hawk	Accipitriformes	Birds	0.0061	0	0	0	0	0	0	0.0028
20	Ithaginis cruentus	Blood pheasant	Galliformes	Birds	0	0	0.0052	0	0	0	0	0.0009
					1	1	1	1	1	1	1	1
RRA
Prey taxon	Scientific name	Common name	Order	Prey categories	Suojia	Zhaqing	Angsai	Baizha	Xialaxiu	Zhongda	Haxiu	ALL
					n = 165	n = 70	n = 64	n = 20	n = 13	n = 10	n = 9	n = 351
1	Pseudois nayaur	Blue sheep	Artiodactyla	Wild ungulates	0.9187	0.7032	0.7653	0.7484	0.6923	0.9	0.5939	0.8208
2	Przewalskium albirostris	White-lipped deer	Artiodactyla	Wild ungulates	0	0	0.0435	0	0	0	0.1111	0.0108
3	Sus scrofa	Wild boar	Artiodactyla	Wild ungulates	0	0.0054	0.0045	0	0	0	0.1111	0.0048
4	Cervus elaphus	Red deer	Artiodactyla	Wild ungulates	0	0	0	0	0.0769	0	0	0.0028
5	Procapra picticaudata	Tibetan gazelle	Artiodactyla	Wild ungulates	0	0.0248	0	0	0	0	0	0.005
6	Capricornis milneedwardsii	Chinese serow	Artiodactyla	Wild ungulates	0	0.0092	0	0	0	0	0	0.0018
7	Capra hircus	Domestic goat	Artiodactyla	Livestock	0.0061	0	0	0	0.2308	0	0	0.0114
8	Bos grunniens	Domestic yak	Artiodactyla	Livestock	0.0225	0.0916	0.0395	0.05	0	0	0	0.0389
9	Equus caballus	Domestic horse	Perissodactyla	Livestock	0	0	0	0.05	0	0	0	0.0028
10	Ovis aries	Domestic sheep	Artiodactyla	Livestock	0	0.0429	0	0	0	0	0	0.0085
11	Marmota himalayana	Himalayan marmot	Rodentia	Small mammals	0.019	0.1008	0.0368	0.1451	0	0.1	0.1839	0.0516
12	Ochotona koslowi	Kozlov's pika	Lagomorpha	Small mammals	0	0.0006	0.0625	0	0	0	0	0.0115
13	Ochotona curzoniae	Plateau pika	Lagomorpha	Small mammals	0.0169	0.0172	0.0077	0.002	0	0	0	0.0129
14	Apodemus draco	South China field mouse	Rodentia	Small mammals	0	0	0.0206	0.0045	0	0	0	0.004
15	Neodon irene	Chinese scrub vole	Rodentia	Small mammals	0.0107	0	0	0	0	0	0	0.005
16	Niviventer confucianus	Confucian niviventer	Rodentia	Small mammals	0	0	0.0098	0	0	0	0	0.0018
17	Apodemus latronum	Large-eared field mouse	Rodentia	Small mammals	0	0.0037	0.005	0	0	0	0	0.0016
18	Lepus oiostolus	Woolly hare	Lagomorpha	Small mammals	0	0.0006	0.0027	0	0	0	0	0.0006
19	Buteo sp.	Buteonine hawk	Accipitriformes	Birds	0.0061	0	0	0	0	0	0	0.0028
20	Ithaginis cruentus	Blood pheasant	Galliformes	Birds	0	0	0.0021	0	0	0	0	0.0004
					1	1	1	1	1	1	1	1
